# Supplementary material
Source: PubMed Central journal article supplement (PMC3105263)
Supplement: supp_kwq428_kwq428_Web_Material.pdf [file supp_kwq428_kwq428_Web_Material.pdf]

Country A. Steeper slope in final year (compared to first year) yields a negative change score between first and final year SII and indicates overweight prevalence increased faster in wealthier groups

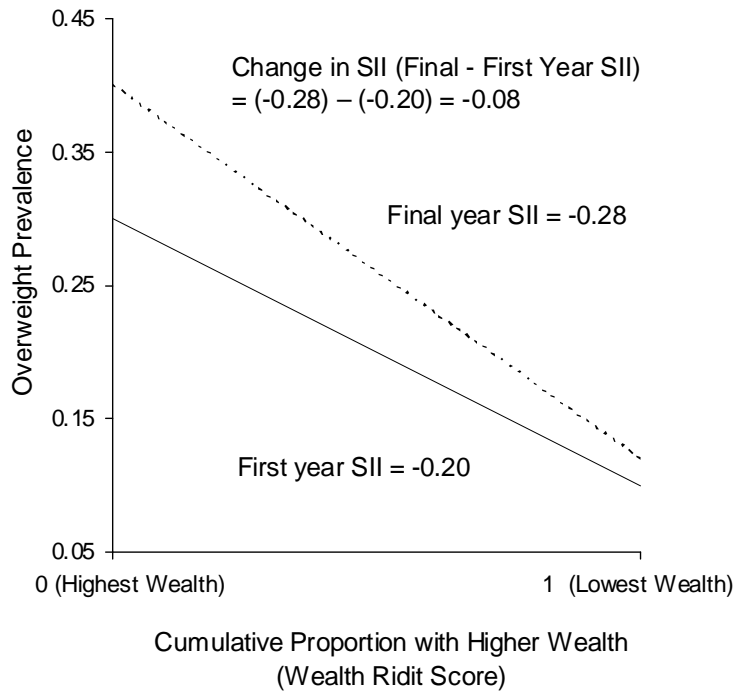

Country B. Flatter slope in final year (compared to first year) yields a positive change score between first and final year SII and indicates overweight prevalence increased faster in less wealthy groups

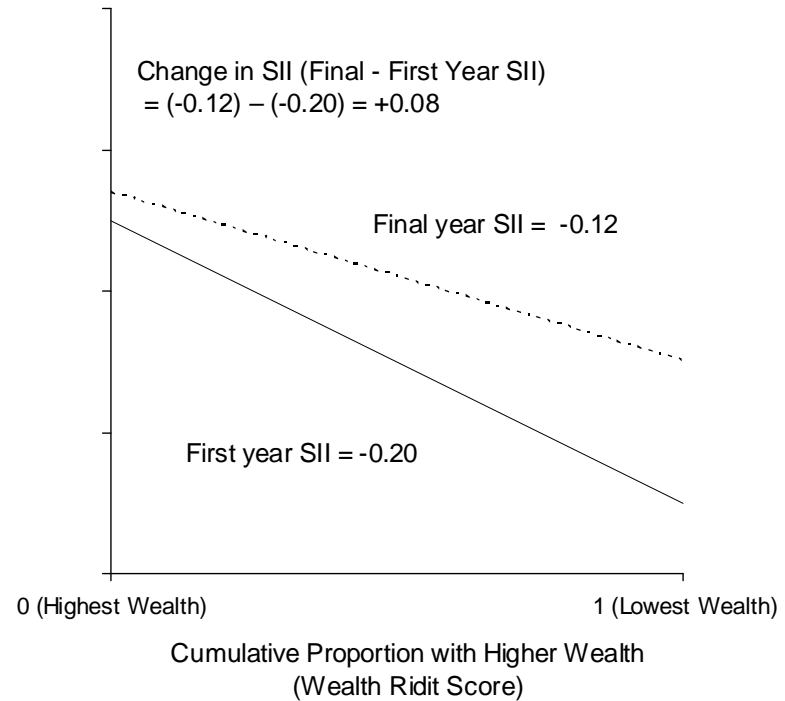

— First Year - - - Final Year

## WEB FIGURE LEGEND

Web Figure 1. Illustration of the slope index of inequality (SII) in overweight<sup>a,b</sup>, change in SII<sup>c</sup>, and indications for wealth-specific overweight growth rates over time. The SII for overweight is a summary measure of the level of inequality in overweight prevalence by wealth group. It is a regression-based measure that is obtained by regressing the age-standardized overweight prevalence for each SES group on the rank of each SES group in the social hierarchy, ranked by the cumulative proportion of the population with a higher wealth than the average person in each quintile (the wealth rdit score; highest wealth=0 and lowest wealth=1). A negative SII indicates lower levels of overweight in the lower wealth groups, whereas a positive SII means the lower levels of overweight in the higher wealth groups. The *change in SII* is the main outcome measure in these analyses and is the change in the SII between the first and last survey waves. A *negative change* in SII between the survey years is indicative of a faster rate of overweight prevalence growth among the higher wealth groups while a *positive change* in SII is indicative of a faster rate of overweight prevalence growth among the lower wealth groups. Overweight is defined by BMI $\geq$ 25 (15).

Web Table 1. Descriptive Country-Level Characteristics for the First and Last Survey Years of Repeated Cross-Sectional Surveys From 37 Developing Countries (1992-2007).

|               | Year | Sample Size | GDP <sup>a</sup> | Annualized percent change in GDP | Gini coefficient <sup>b</sup> | Age-standardized percent overweight <sup>c</sup> | Annualized Change in SII <sup>d</sup> | Annualized Change in Prevalence difference <sup>e</sup> |
|---------------|------|-------------|------------------|----------------------------------|-------------------------------|--------------------------------------------------|---------------------------------------|---------------------------------------------------------|
| Armenia       | 2000 | 1,723       | 2,294            |                                  |                               | 43.8                                             |                                       |                                                         |
| Armenia       | 2005 | 1,433       | 4,098            | 15.7                             | 34.7                          | 45.4                                             | 1.6                                   | 0.7                                                     |
| Bangladesh    | 1996 | 3,536       | 781              |                                  |                               | 2.7                                              |                                       |                                                         |
| Bangladesh    | 2007 | 5,320       | 1,178            | 4.6                              | 30.8                          | 11.5                                             | -2.1                                  | -1.5                                                    |
| Benin         | 1996 | 2,222       | 1,173            |                                  |                               | 11.7                                             |                                       |                                                         |
| Benin         | 2006 | 10,089      | 1,315            | 1.2                              | 38.6                          | 18.4                                             | -2.1                                  | -1.2                                                    |
| Bolivia       | 1994 | 2,183       | 3,118            |                                  |                               | 34.9                                             |                                       |                                                         |
| Bolivia       | 2003 | 8,142       | 3,426            | 1.1                              | 58.8                          | 50.6                                             | 0.4                                   | 0.1                                                     |
| Burkina Faso  | 1992 | 3,262       | 737              |                                  |                               | 7.2                                              |                                       |                                                         |
| Burkina Faso  | 2003 | 7,737       | 982              | 3.0                              | 45.7                          | 8.8                                              | -1.1                                  | -1.2                                                    |
| Cambodia      | 2000 | 3,231       | 1,009            |                                  |                               | 6.3                                              |                                       |                                                         |
| Cambodia      | 2005 | 3,649       | 1,443            | 8.6                              | 41.9                          | 10.0                                             | -1.8                                  | -1.1                                                    |
| Cameroon      | 1998 | 1,498       | 1,765            |                                  |                               | 21.9                                             |                                       |                                                         |
| Cameroon      | 2004 | 2,826       | 1,957            | 1.8                              | 44.6                          | 30.3                                             | -2.1                                  | -1.9                                                    |
| Chad          | 1996 | 3,430       | 904              |                                  |                               | 5.2                                              |                                       |                                                         |
| Chad          | 2004 | 2,714       | 1,407            | 6.9                              | 39.8                          | 8.7                                              | -0.8                                  | -0.9                                                    |
| China         | 1991 | 2,599       | 1,099            |                                  |                               | 11.6                                             |                                       |                                                         |
| China         | 2006 | 2,467       | 4,524            | 19.5                             | 41.5                          | 19.2                                             | 0.4                                   | -0.6                                                    |
| Colombia      | 1995 | 3,189       | 6,700            |                                  |                               | 46.6                                             |                                       |                                                         |
| Colombia      | 2005 | 14,618      | 7,231            | 0.8                              | 57.5                          | 47.0                                             | 0.7                                   | 1.3                                                     |
| Cote d'Ivoire | 1994 | 2,867       | 1,656            |                                  |                               | 16.0                                             |                                       |                                                         |
| Cote d'Ivoire | 1998 | 1,607       | 1,871            | 3.3                              | 40.2                          | 21.1                                             | -2.3                                  | -0.5                                                    |

|            |      |        |       |      |      |      |      |      |
|------------|------|--------|-------|------|------|------|------|------|
| Egypt      | 1995 | 6,365  | 3,221 |      |      | 52.8 |      |      |
| Egypt      | 2005 | 10,085 | 4,319 | 3.4  | 31.7 | 76.1 | 2.3  | 1.9  |
| Ethiopia   | 2000 | 7,265  | 528   |      |      | 2.5  |      |      |
| Ethiopia   | 2005 | 3,326  | 633   | 4.0  | 29.9 | 3.6  | -0.4 | -0.5 |
| Ghana      | 1993 | 1,691  | 943   |      |      | 12.8 |      |      |
| Ghana      | 2003 | 2,826  | 1,116 | 1.8  | 40.8 | 25.2 | -2.5 | -2.2 |
| Guatemala  | 1995 | 4,778  | 3,664 |      |      | 36.3 |      |      |
| Guatemala  | 1998 | 2,288  | 3,860 | 1.8  | 55.7 | 46.9 | -5.6 | -6.0 |
| Guinea     | 1999 | 3,133  | 990   |      |      | 12.5 |      |      |
| Guinea     | 2005 | 2,422  | 1,056 | 1.1  | 43.3 | 13.5 | 0.4  | 0.9  |
| Haiti      | 1994 | 1,727  | 1,226 |      |      | 11.3 |      |      |
| Haiti      | 2005 | 2,492  | 1,068 | -1.2 | 59.5 | 23.2 | -1.2 | -0.6 |
| Indonesia  | 1997 | 2,147  | 3,075 |      |      | 19.9 |      |      |
| Indonesia  | 2007 | 3,270  | 3,504 | 1.4  | 39.4 | 30.4 | -0.2 | 0.4  |
| Jordan     | 1997 | 2,930  | 3,520 |      |      | 65.0 |      |      |
| Jordan     | 2007 | 2,915  | 4,775 | 3.6  | 37.7 | 59.9 | 1.5  | 1.0  |
| Kazakhstan | 1995 | 1,302  | 4,499 |      |      | 38.5 |      |      |
| Kazakhstan | 1999 | 674    | 4,909 | 2.3  | 35.3 | 31.3 | -0.8 | -1.0 |
| Kenya      | 1993 | 3,143  | 1,307 |      |      | 15.7 |      |      |
| Kenya      | 2003 | 3,986  | 1,279 | -0.2 | 42.3 | 24.2 | -1.7 | -1.3 |
| Madagascar | 1997 | 2,419  | 873   |      |      | 4.2  |      |      |
| Madagascar | 2003 | 3,771  | 847   | -0.5 | 44.6 | 6.3  | -1.3 | -0.5 |
| Malawi     | 1992 | 2,100  | 601   |      |      | 10.0 |      |      |
| Malawi     | 2004 | 6,521  | 648   | 0.7  | 44.7 | 15.0 | -0.6 | -0.3 |
| Mali       | 1995 | 3,970  | 762   |      |      | 9.0  |      |      |
| Mali       | 2006 | 8,476  | 1,025 | 3.1  | 39.5 | 18.9 | -1.5 | -0.8 |
| Morocco    | 1992 | 2,795  | 2,746 |      |      | 32.8 |      |      |
| Morocco    | 2003 | 6,555  | 3,395 | 2.1  | 40.0 | 42.3 | 1.7  | 0.9  |
| Mozambique | 1997 | 3,012  | 451   |      |      | 10.3 |      |      |
| Mozambique | 2003 | 6,736  | 606   | 5.8  | 45.8 | 15.5 | -1.6 | -1.0 |

|           |      |        |       |      |      |      |      |      |
|-----------|------|--------|-------|------|------|------|------|------|
| Namibia   | 1992 | 2,029  | 4,305 |      |      | 22.2 |      |      |
| Namibia   | 2006 | 4,841  | 5,669 | 2.3  | 74.3 | 32.5 | 0.3  | -0.1 |
| Nepal     | 1996 | 3,187  | 829   |      |      | 1.7  |      |      |
| Nepal     | 2006 | 5,003  | 976   | 1.8  | 42.5 | 7.8  | -2.0 | -1.6 |
| Nicaragua | 1997 | 6,887  | 1,925 |      |      | 47.0 |      |      |
| Nicaragua | 2001 | 6,278  | 2,145 | 2.9  | 52.1 | 54.3 | -1.3 | -0.9 |
| Niger     | 1998 | 3,173  | 607   |      |      | 8.3  |      |      |
| Niger     | 2006 | 2,909  | 597   | -0.1 | 40.5 | 14.9 | -1.5 | -0.5 |
| Peru      | 1992 | 4,986  | 4,359 |      |      | 42.1 |      |      |
| Peru      | 2000 | 12,155 | 5,513 | 3.3  | 45.6 | 51.4 | -0.4 | -0.7 |
| Rwanda    | 2000 | 5,092  | 658   |      |      | 13.5 |      |      |
| Rwanda    | 2005 | 2,918  | 793   | 4.1  | 46.7 | 11.8 | -0.1 | 0.2  |
| Tanzania  | 1996 | 3,597  | 826   |      |      | 13.3 |      |      |
| Tanzania  | 2004 | 5,776  | 990   | 2.5  | 34.2 | 18.2 | -1.8 | -1.4 |
| Turkey    | 1993 | 2,222  | 8,434 |      |      | 51.6 |      |      |
| Turkey    | 2003 | 2,897  | 9,505 | 1.3  | 42.1 | 61.5 | 1.9  | 1.2  |
| Uganda    | 1995 | 2,968  | 666   |      |      | 9.4  |      |      |
| Uganda    | 2006 | 1,616  | 966   | 4.1  | 42.1 | 17.2 | -2.1 | -1.4 |
| Zambia    | 1996 | 3,558  | 1,149 |      |      | 14.8 |      |      |
| Zambia    | 2007 | 3,981  | 1,212 | 0.5  | 49.7 | 21.1 | -1.9 | -1.5 |
| Zimbabwe  | 1994 | 1,779  | 1,180 |      |      | 26.4 |      |      |
| Zimbabwe  | 2005 | 4,698  | 1,430 | 1.2  | 50.1 | 28.4 | -1.7 | -1.4 |

<sup>a</sup>GDP is per capita and adjusted by the purchasing power parity method and adjusted for inflation using the \$2005 International dollar as a base.

<sup>b</sup>The Gini coefficient indicated the level of income inequality with lower numbers indicating lower levels of income inequality and higher numbers indicating higher levels of income inequality. The theoretical range for the Gini coefficient is 0-100 where zero would indicate complete income equality and 100 indicates that 1 person holds 100% of the income and the remaining population holds 0% of the income (19).

<sup>c</sup>Overweight is defined by  $BMI \geq 25$  (15).

<sup>d</sup>A positive change in the SII indicates a faster increase in overweight prevalence among the lower wealth groups and a decrease in the magnitude of the inequality in overweight in most cases (exception is Armenia where positive change still indicates lower wealth groups increased faster, but this results in an increase in the magnitude of inequality). A negative change in SII indicates a faster increase in overweight prevalence among the higher wealth groups and an increase in the overall inequality in overweight. Annualized change in SII is the change in SII divided by the number of years between the two measurements.

<sup>e</sup>Annualized change in prevalence difference is the overweight prevalence in the last year minus that in the first year for the lowest wealth group minus the equivalent prevalences in the highest wealth group. It is displayed in this table for comparison to the annualized slope index of inequality in direction of the estimates.
